# Supplementary material for: A combined technique for the pretreatment of ultra trace bisphenol A in environmental water based on magnetic matrix solid phase extraction assisted dispersive liquid–liquid microextraction
Source: Royal Society of Chemistry journal article supplement (doi:10.1039/c5ay02711j), 2015-01-01
Supplement: c5ay02711j9.pdf [file c5ay02711j9.pdf]

**Fig.1** Effect of MMSPD conditions on MMSPD-DLLME

(a) Kind of elute

Conditions: volume of elute, 2 mL; adsorption time, 20min; elution time, 5 min; no salt addition; no pH adjustment; extraction solvent, 40  $\mu\text{L}$  carbon tetrachloride; concentration of BPA, 5.0  $\mu\text{g L}^{-1}$

(b) Volume of elute

Conditions: kind of elute, acetone; adsorption time, 20min; elution time, 5 min; no salt addition; no pH adjustment; extraction solvent, 40  $\mu\text{L}$  carbon tetrachloride; concentration of BPA, 5.0  $\mu\text{g L}^{-1}$

(c) Sorption time

Conditions: kind of elute, acetone; volume of elute, 2 mL; elution time, 5 min; no salt addition; no pH adjustment; extraction solvent, 40  $\mu\text{L}$  carbon tetrachloride; concentration of BPA, 5.0  $\mu\text{g L}^{-1}$

(d) Elution time

Conditions: kind of elute, acetone; volume of elute, 2 mL; adsorption time, 15 min; no salt addition; no pH adjustment; extraction solvent, 40  $\mu\text{L}$  carbon tetrachloride; concentration of BPA, 5.0  $\mu\text{g L}^{-1}$

(e) Sample pH

Conditions: kind of elute, acetone; volume of elute, 2 mL; adsorption time, 15 min; elution time, 2min; no salt addition; extraction solvent, 40  $\mu\text{L}$  carbon tetrachloride; concentration of BPA, 5.0  $\mu\text{g L}^{-1}$

(f) Ionic strength

Conditions: kind of elute, acetone; volume of elute, 2 mL; adsorption time, 15 min; elution time, 2min; sample pH, 2; extraction solvent, 40  $\mu\text{L}$  carbon tetrachloride; concentration of BPA, 5.0  $\mu\text{g L}^{-1}$

**Fig.2** Effect of DLLME conditions on MMSPD-DLLME

(a) Kind of extraction solvent (1, carbon tetrachloride; 2, chlorobenzene; 3, carbon dichloride; 4, carbon trichloride)

Conditions: kind of elute, acetone; volume of elute, 2 mL; adsorption time, 15 min; elution time, 2min; sample pH, 2; ionic strength, 2.0 % (w/v) sodium chloride;

volume of extraction solvent, 40  $\mu\text{L}$ ; concentration of BPA, 5.0  $\mu\text{g L}^{-1}$

(b) Volume of extraction solvent

Conditions: kind of elute, acetone; volume of elute, 2 mL; adsorption time, 15 min; elution time, 2min; sample pH, 2; ionic strength, 2.0 % (w/v) sodium chloride; kind of extraction solvent, chlorobenzene; concentration of BPA, 5.0  $\mu\text{g L}^{-1}$
