# Supplementary figures and images for: A combined technique for the pretreatment of ultra trace bisphenol A in environmental water based on magnetic matrix solid phase extraction assisted dispersive liquid–liquid microextraction
Source: Royal Society of Chemistry journal article supplement (doi:10.1039/c5ay02711j), 2015-01-01

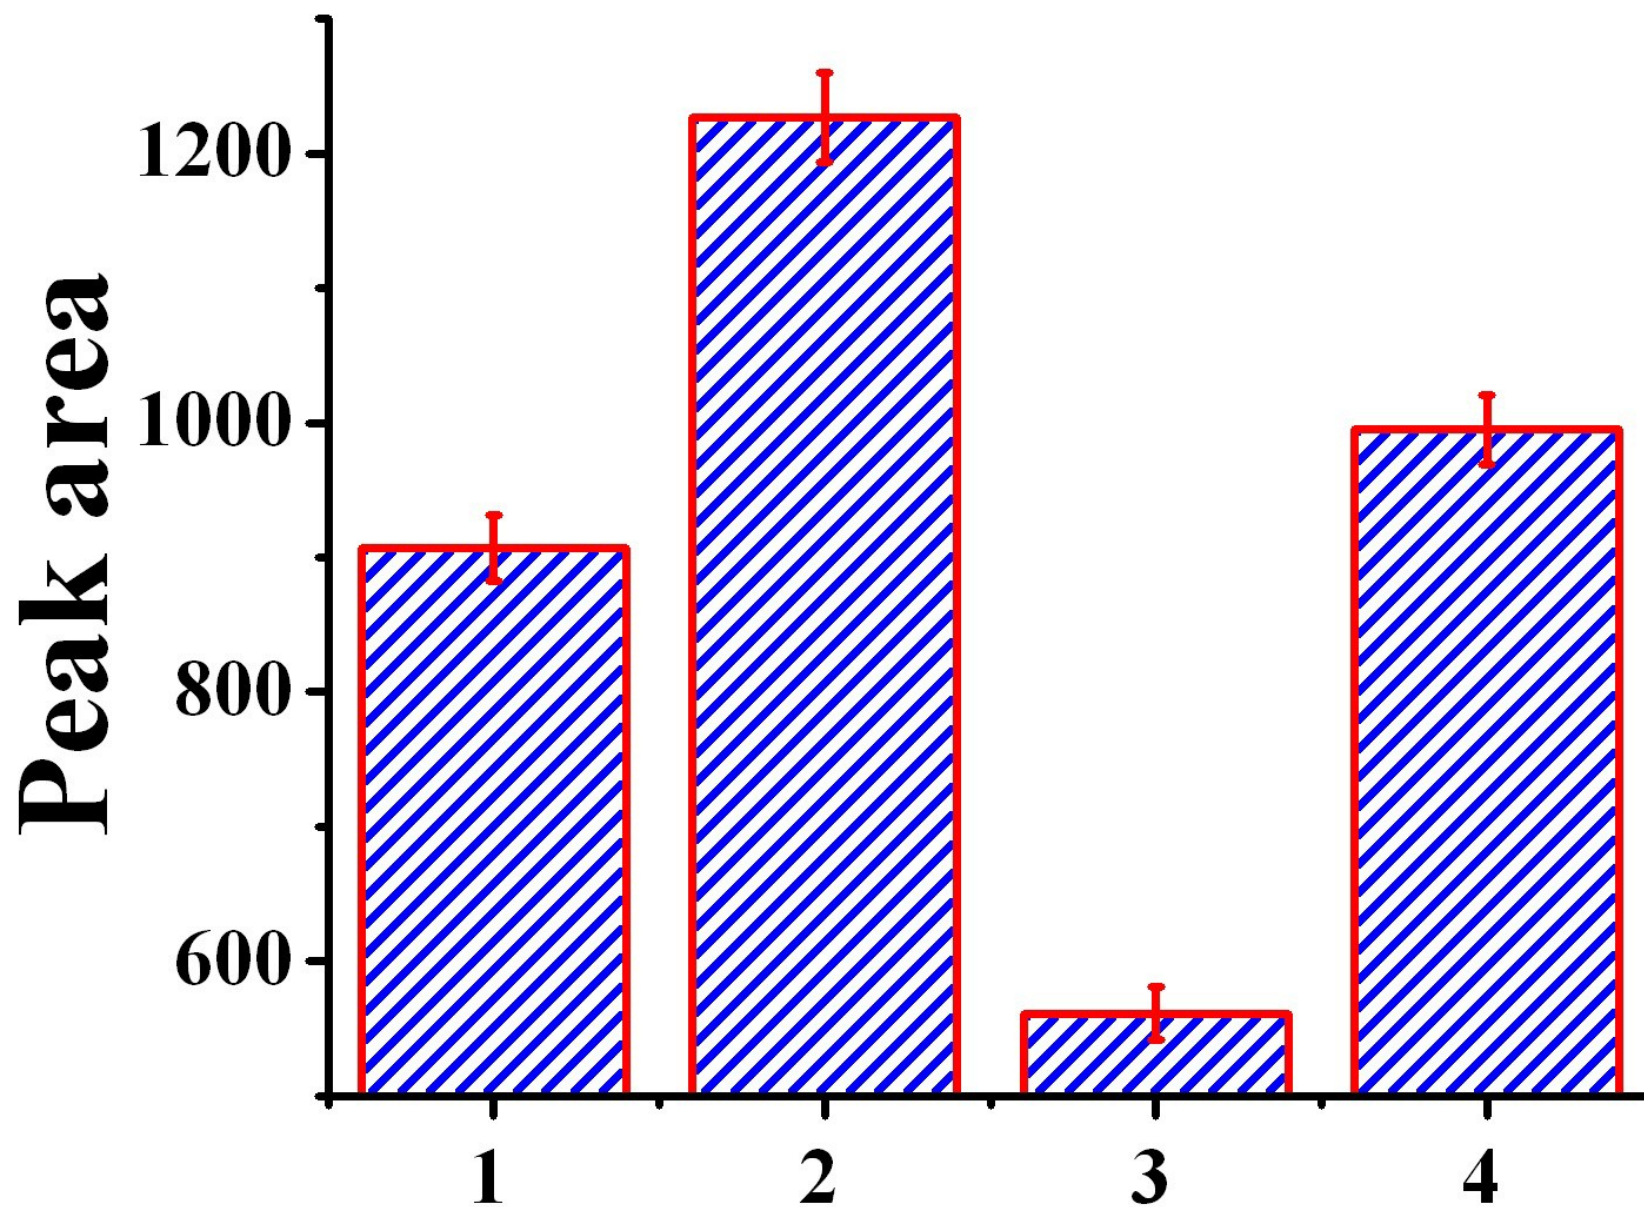

Supplement: c5ay02711j1.pdf [file c5ay02711j1.pdf]

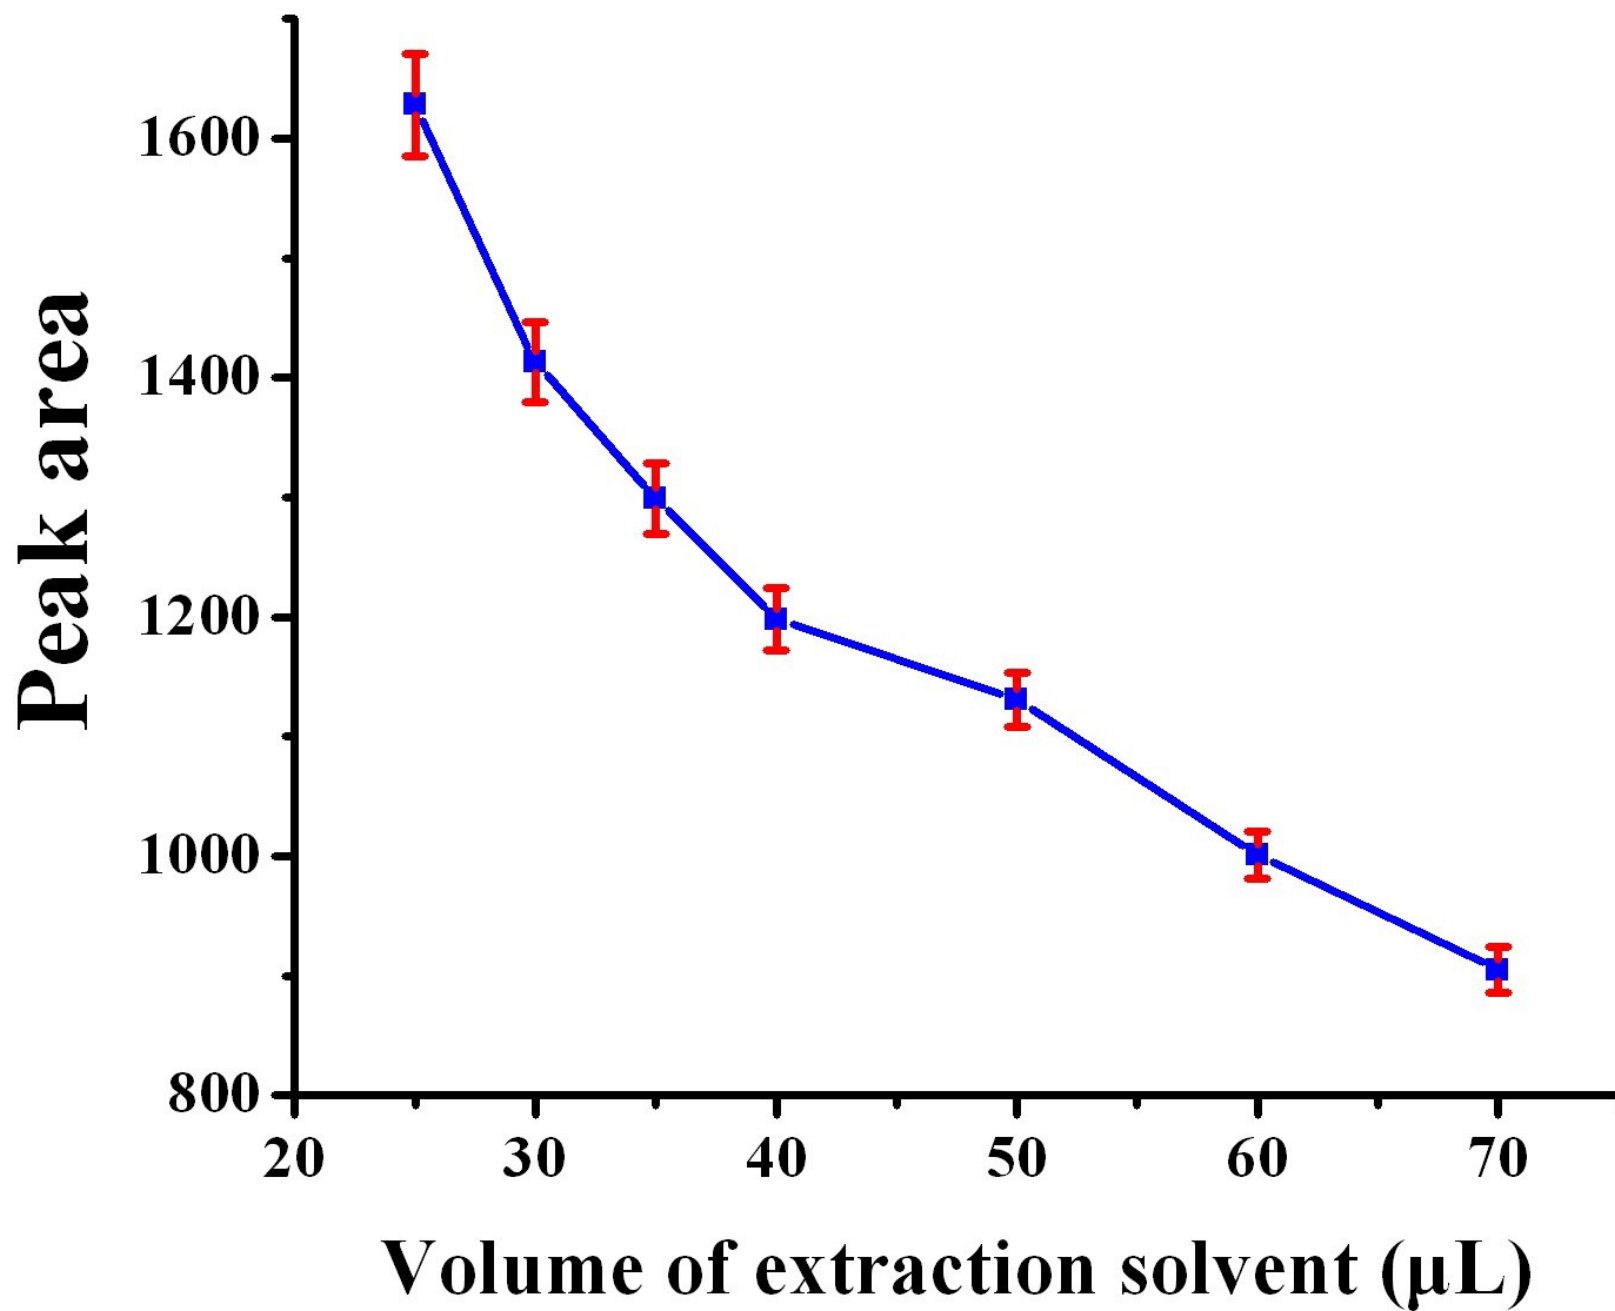

Supplement: c5ay02711j2.pdf [file c5ay02711j2.pdf]

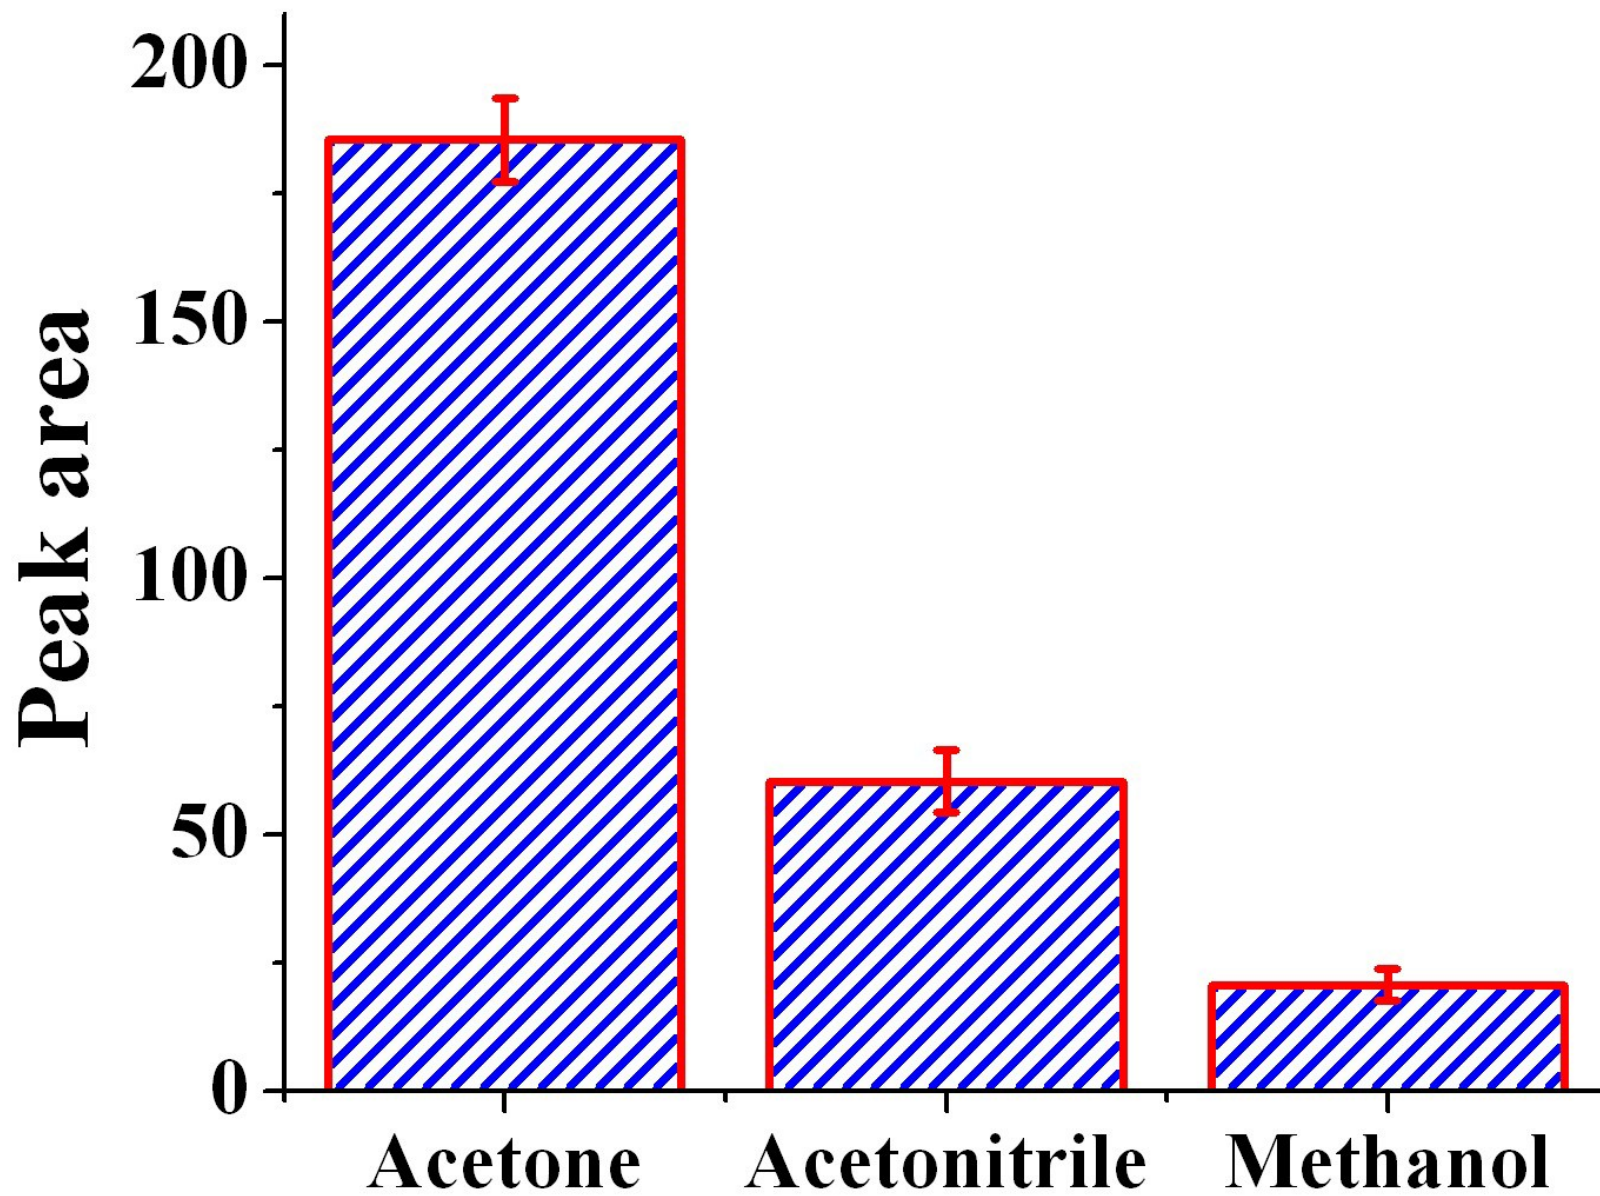

Supplement: c5ay02711j3.pdf [file c5ay02711j3.pdf]

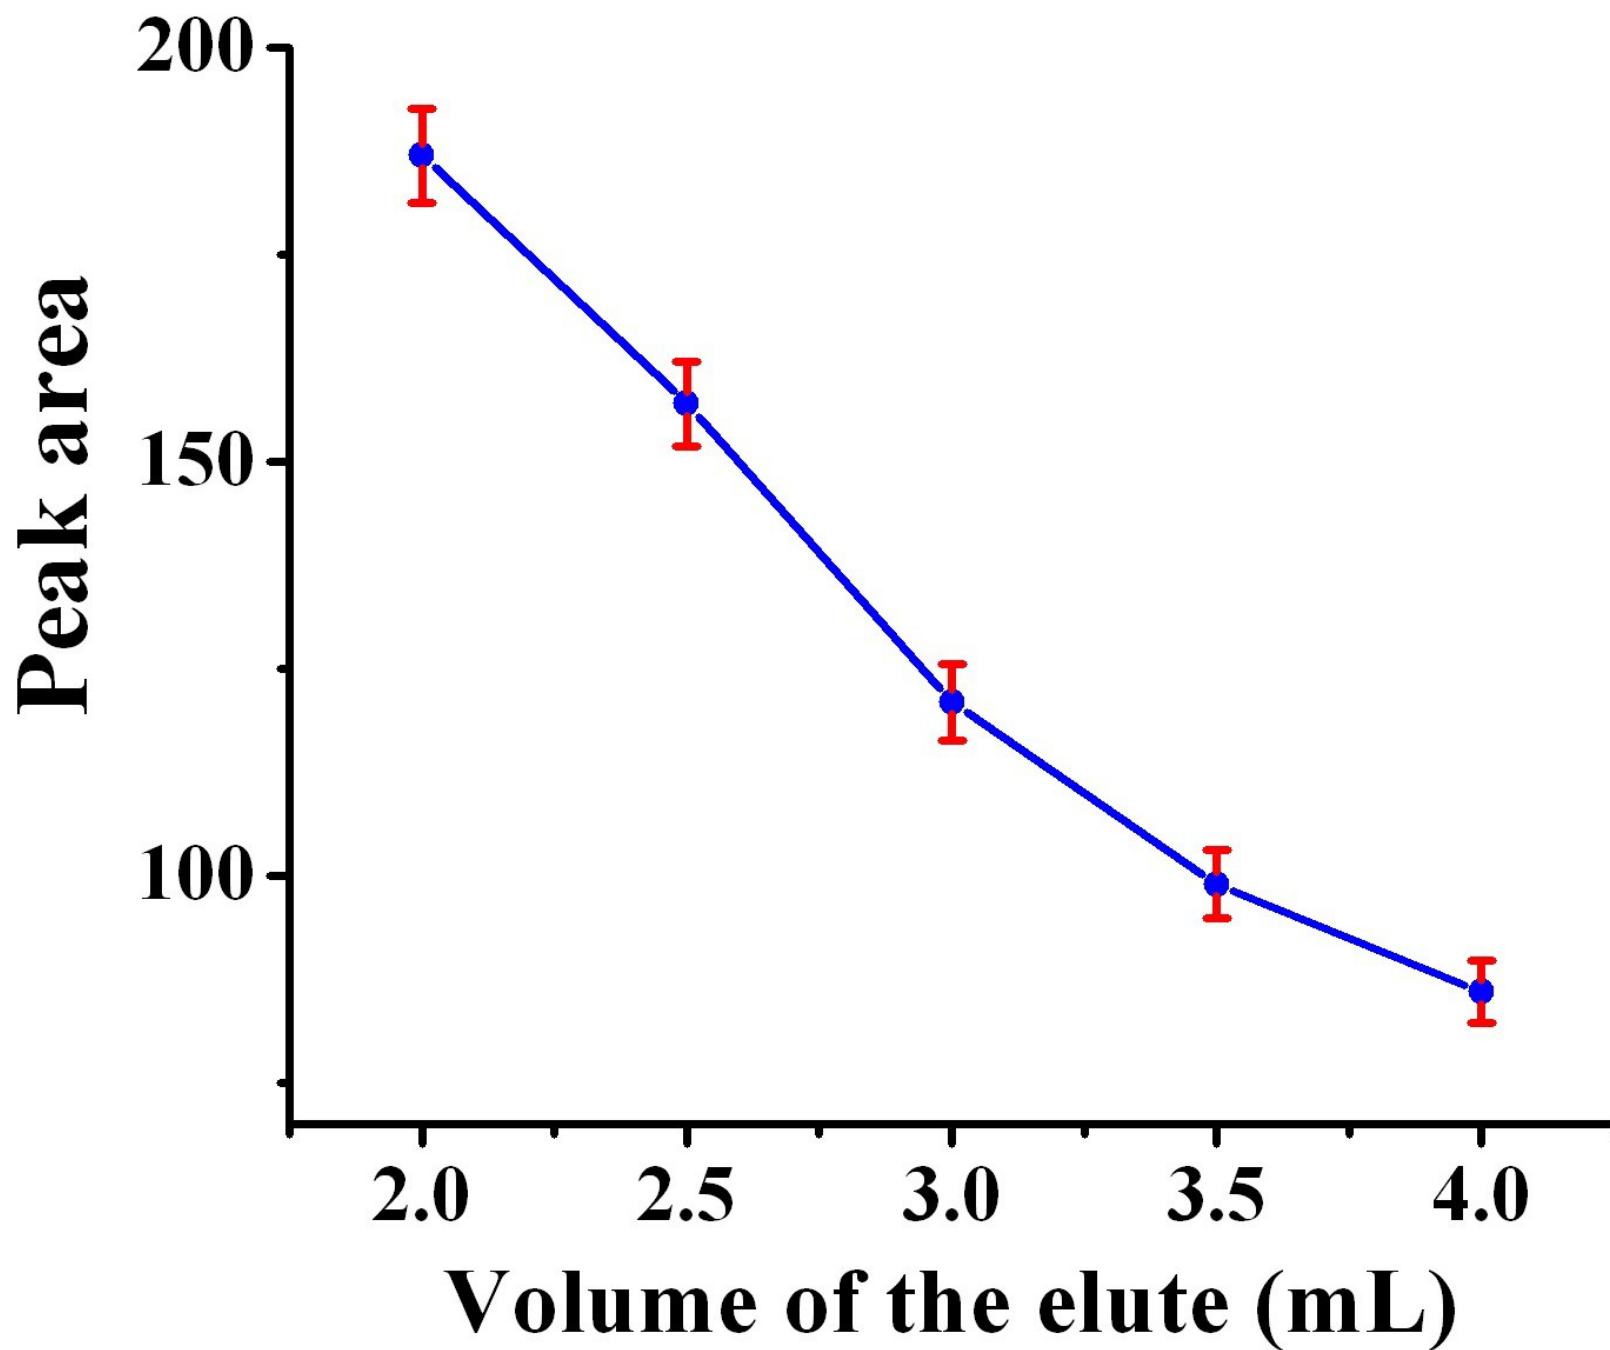

Supplement: c5ay02711j4.pdf [file c5ay02711j4.pdf]

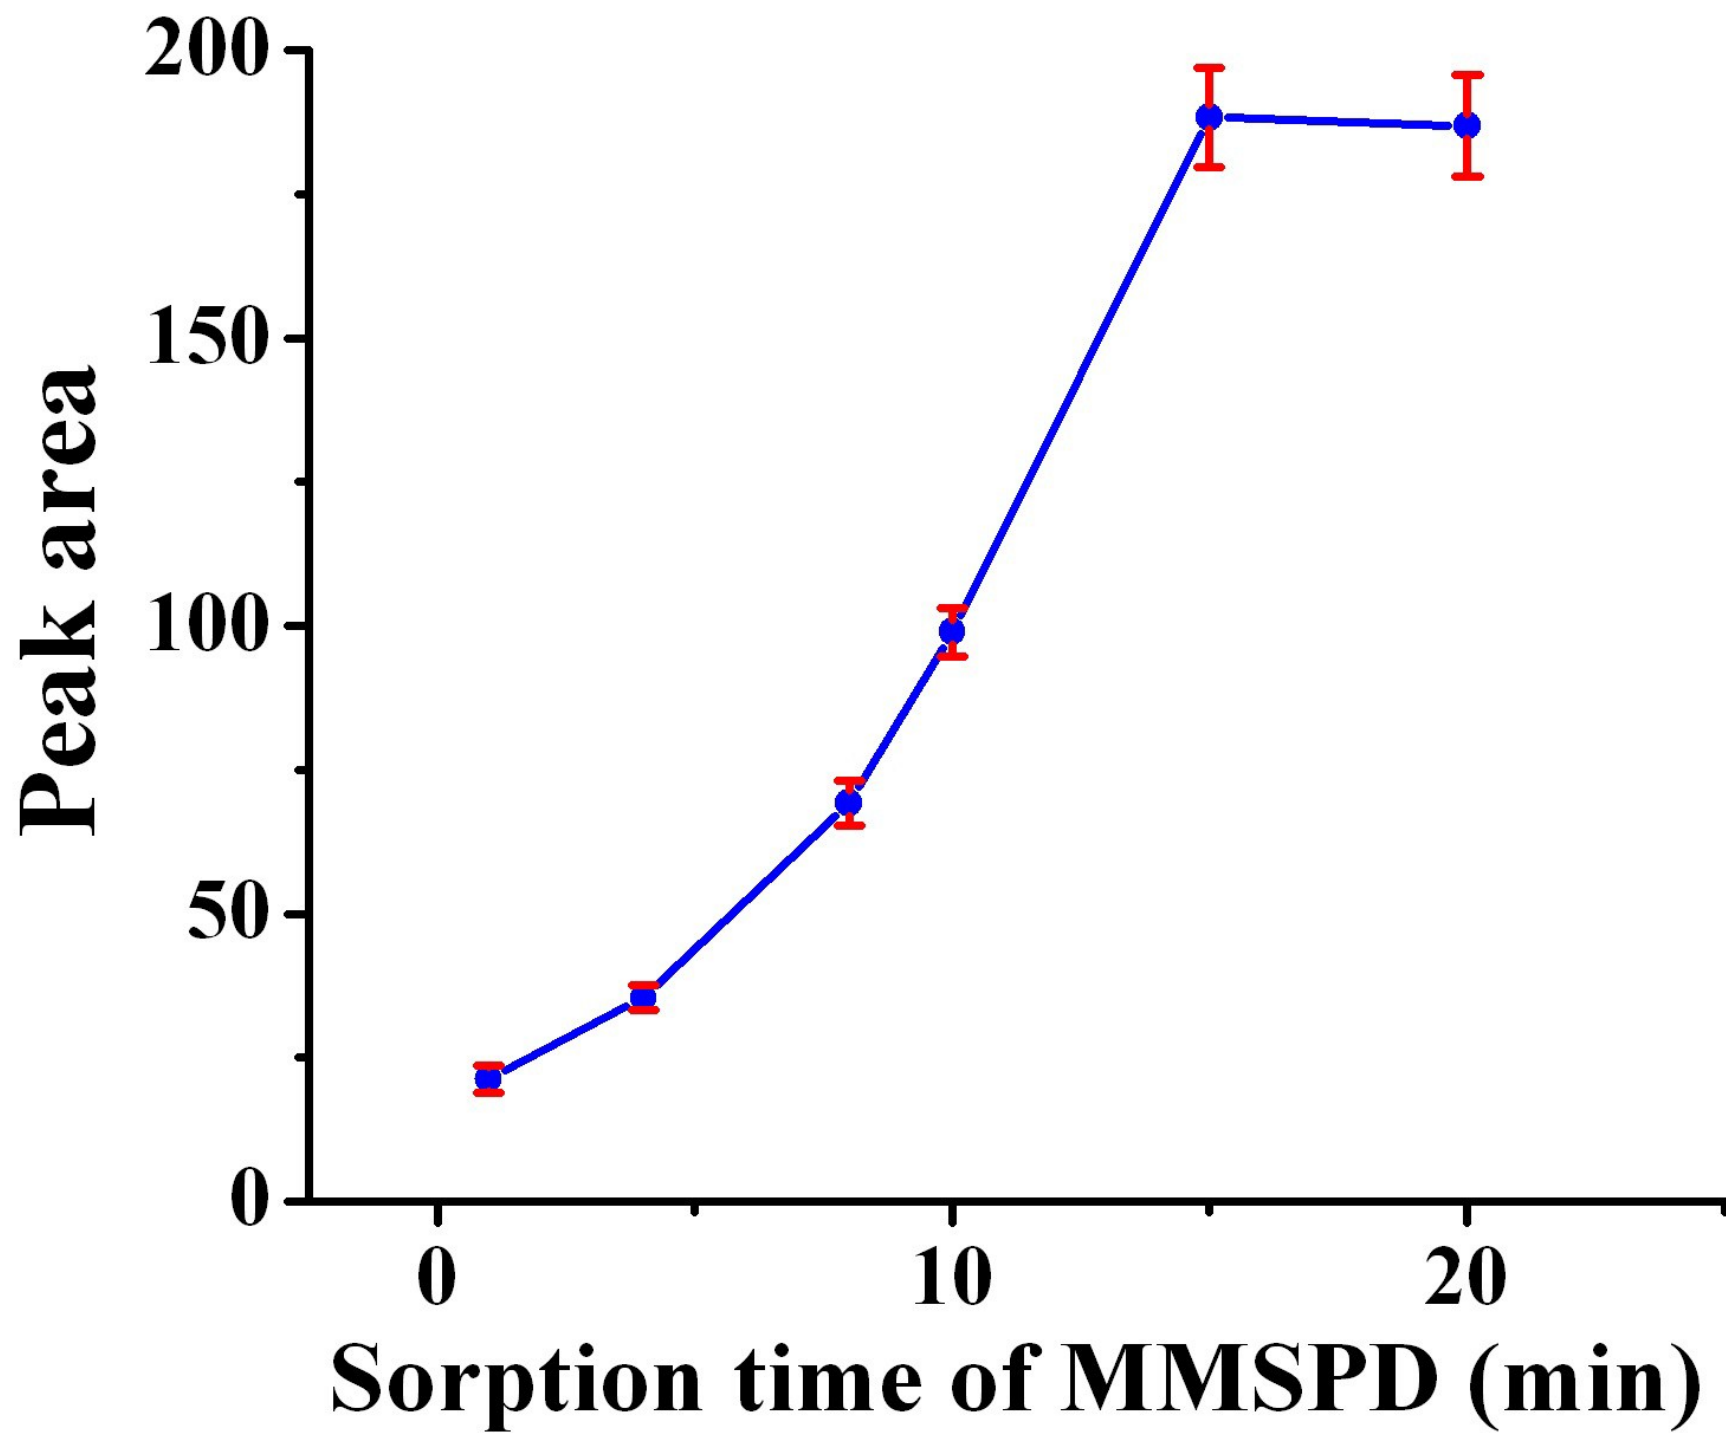

Supplement: c5ay02711j5.pdf [file c5ay02711j5.pdf]

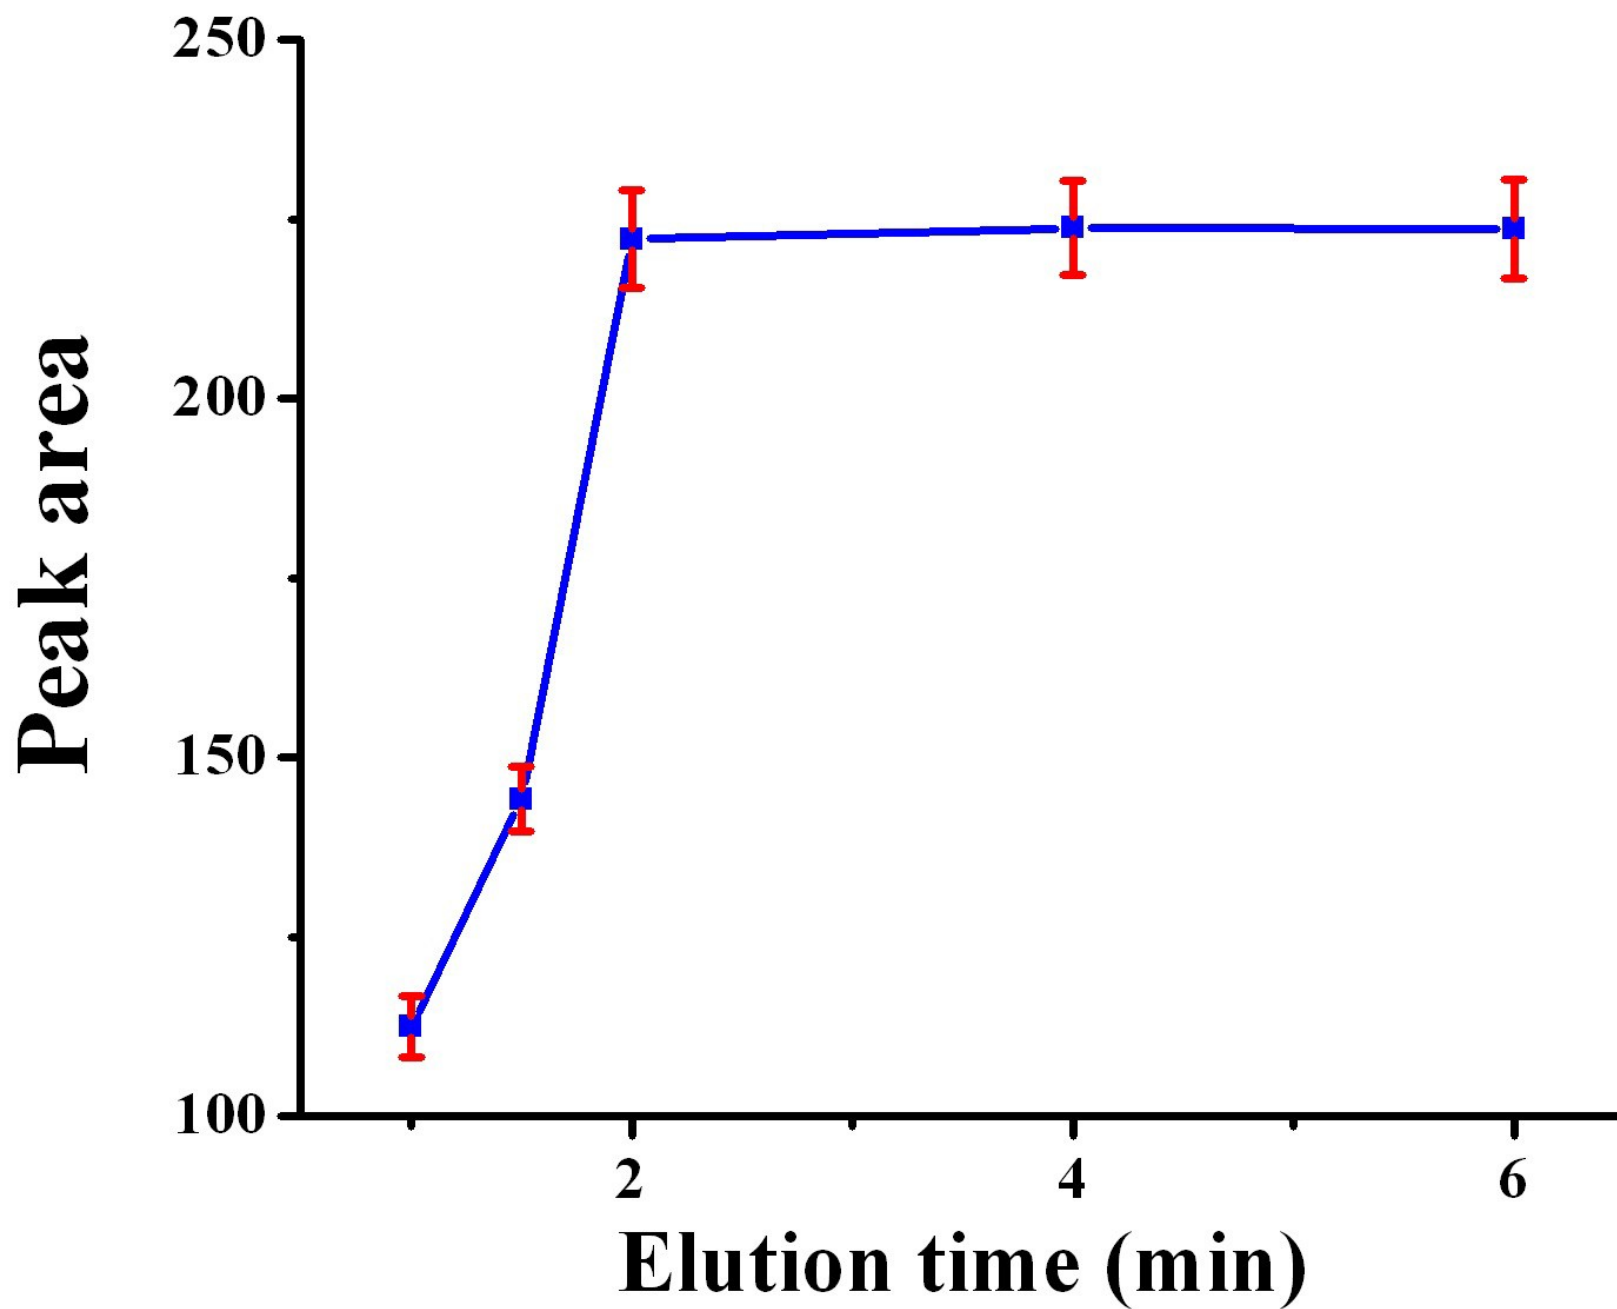

Supplement: c5ay02711j6.pdf [file c5ay02711j6.pdf]

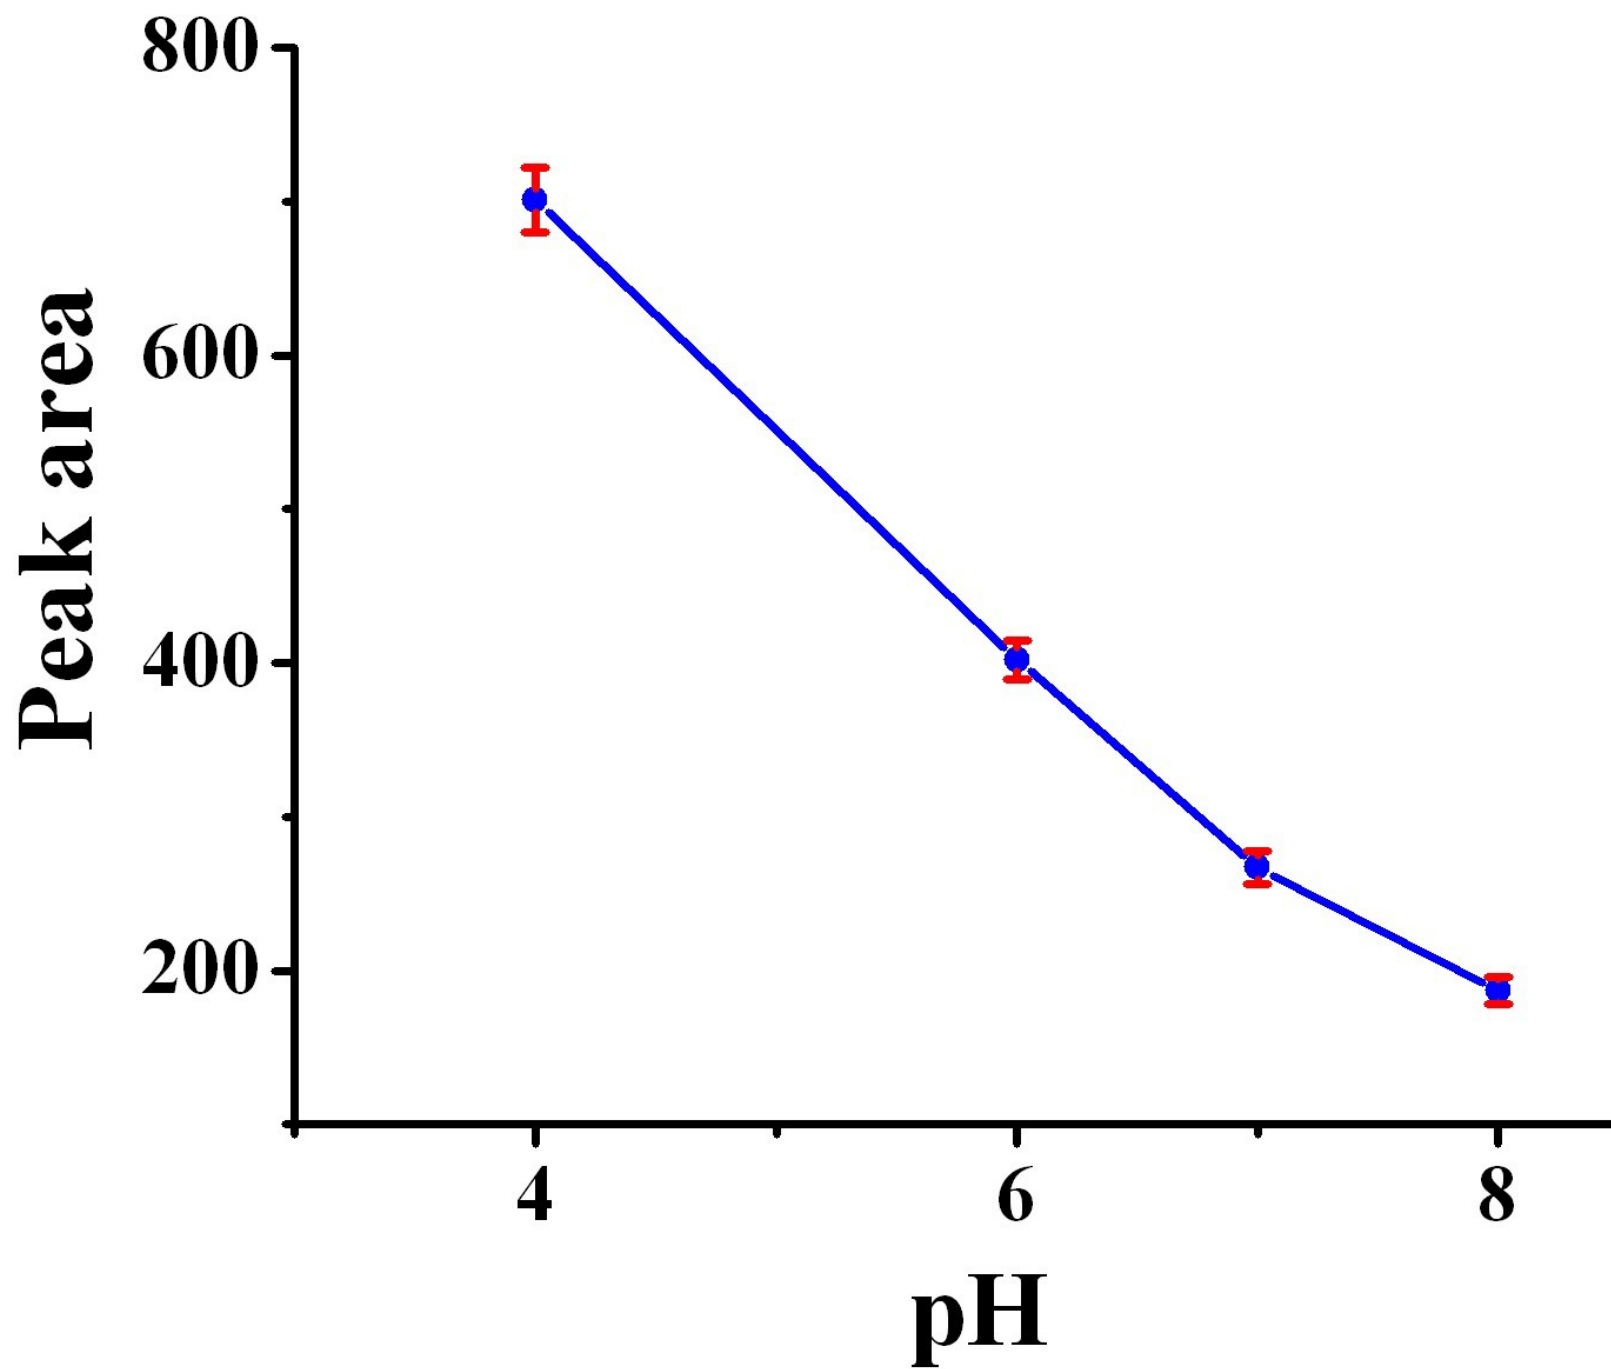

Supplement: c5ay02711j7.pdf [file c5ay02711j7.pdf]

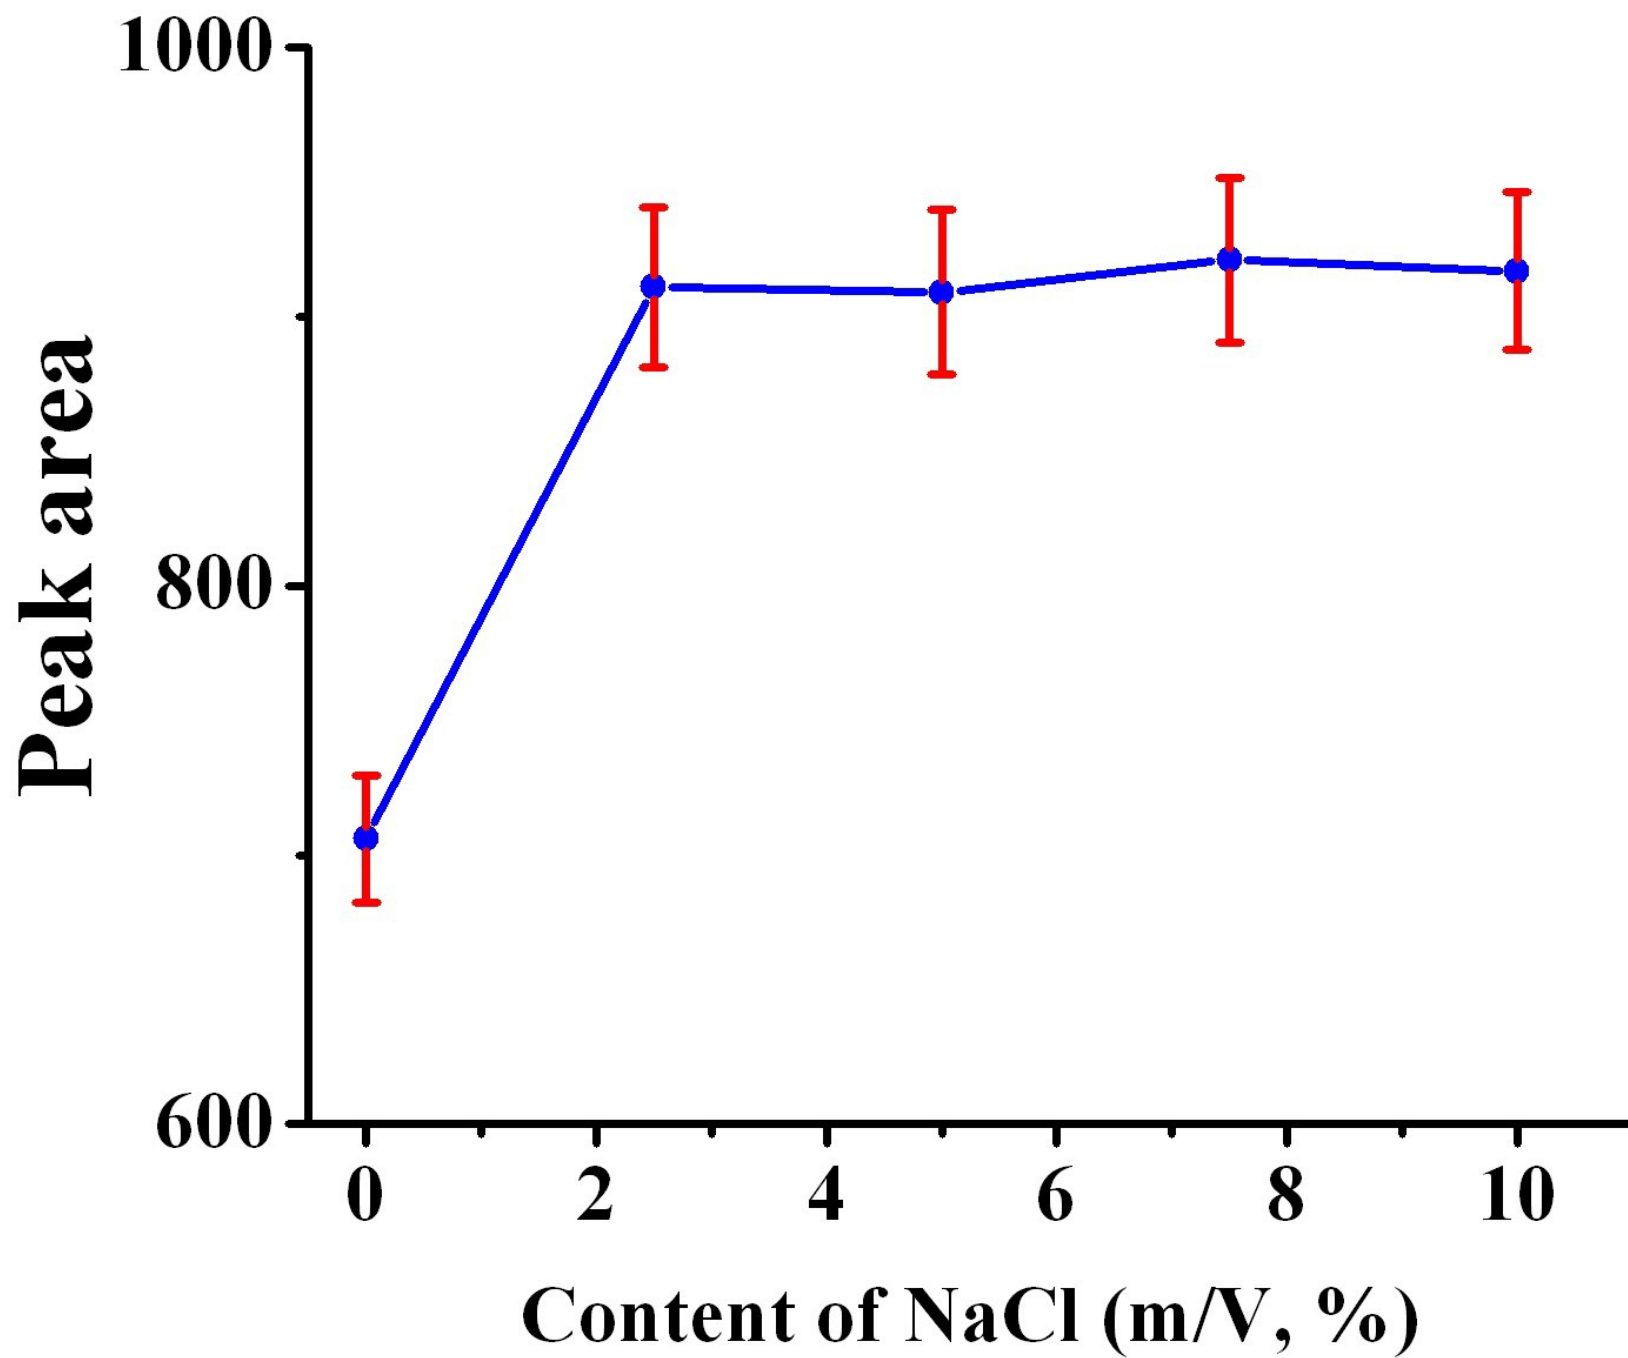

Supplement: c5ay02711j8.pdf [file c5ay02711j8.pdf]
